# Supplementary figures and images for: The PMA phorbol ester tumor promoter increases canonical Wnt signaling via macropinocytosis
Source: eLife journal article supplement (doi:10.7554/elife.89141), 2023-08-01

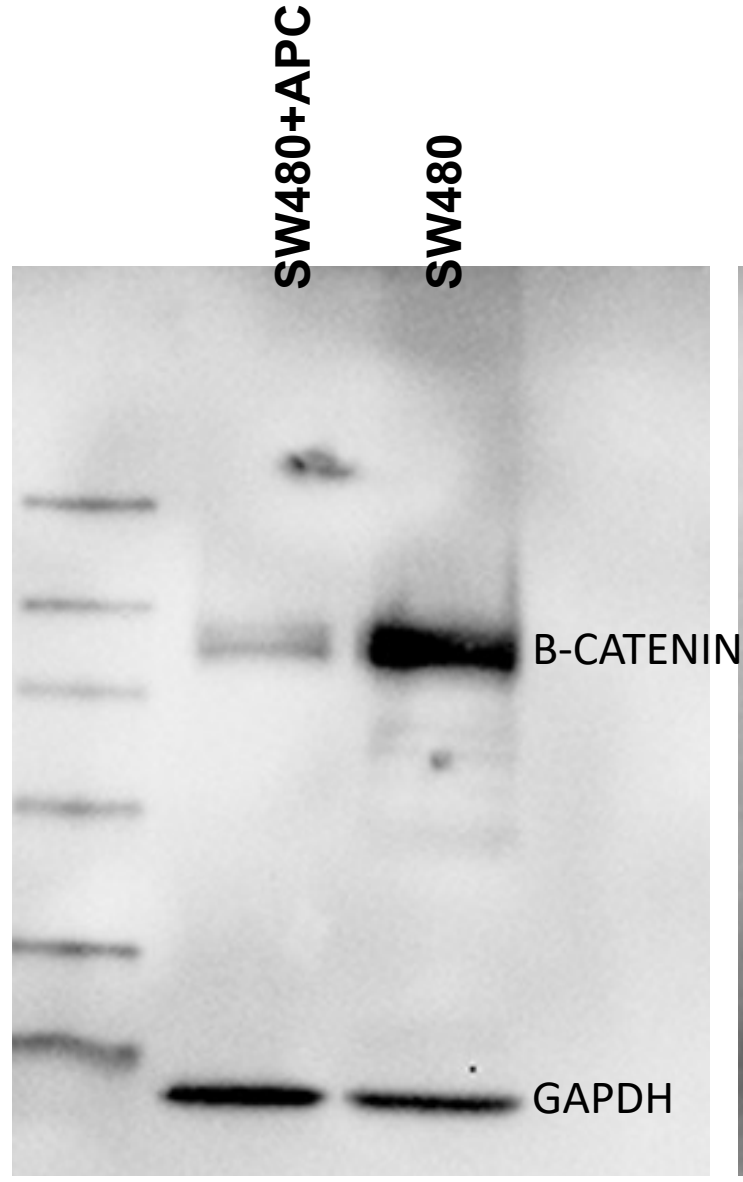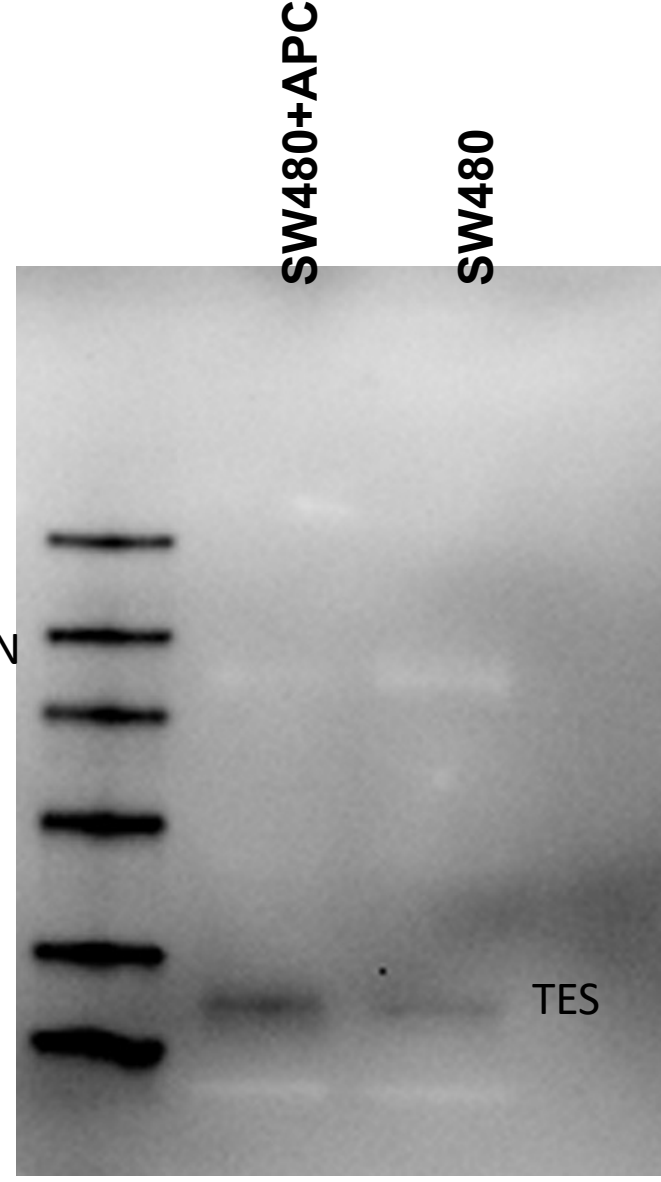

Supplement: fig6-data1 [file elife-89141-fig6-data1-v1.zip]
